# Supplementary material for: Thermodynamics-based Cognitive Demodulation for 'THz Torch' Wireless Communications Links
Source: PubMed Central journal article supplement (PMC7148299; doi:10.1038/s41598-020-62234-1), 2020-04-10
Supplement: 41598_2020_62234_MOESM1_ESM.pdf [file 41598_2020_62234_MOESM1_ESM.pdf]

# Thermodynamics-based Cognitive Demodulation for 'THz Torch' Wireless Communications Links

Hang Ren<sup>1</sup> and Stepan Lucyszyn<sup>1,\*</sup>

<sup>1</sup>Department of Electrical and Electronic Engineering, Imperial College London, London, SW7 2AZ, UK

\*s.lucyszyn@imperial.ac.uk

## Supplementary Table

**Supplementary Table S1.** Band-pass filter specifications

|        | 50% cut-off, $\lambda_1$ to $\lambda_2$ , bandwidth<br>$\mu\text{m}$ (THz) | Aperture size<br>$\text{mm}^2$ | Aperture blockage*<br>% |
|--------|----------------------------------------------------------------------------|--------------------------------|-------------------------|
| ch#1   | 4.48 - 4.54 (65.95 - 66.88)                                                | $4.6 \times 4.6$               | 67                      |
| ch#2   | 4.74 - 4.79 (62.57 - 63.25)                                                | $4.9 \times 4.9$               | 63                      |
| ch#3   | 5.09 - 5.31 (56.44 - 58.83)                                                | $3.8 \times 3.8$               | 78                      |
| ch#4   | 7.01 - 7.11 (42.19 - 42.79)                                                | $5.6 \times 5.6$               | 51                      |
| ch#5   | 7.37 - 7.48 (40.08 - 40.67)                                                | $5.6 \times 5.6$               | 51                      |
| ch#6   | 8.22 - 8.62 (34.81 - 36.45)                                                | $3.8 \times 3.8$               | 78                      |
| ch#7   | 9.61 - 10.03 (29.92 - 31.23)                                               | $3.7 \times 3.7$               | 69                      |
| ch#8   | 10.09 - 10.54 (28.46 - 29.74)                                              | $4.7 \times 4.7$               | 65                      |
| Single | 8.03 - 13.74 (21.83 - 37.33)                                               | $4.6 \times 4.6$               | 67                      |

\* With reference to an unblocked circular filter having diameter  $\varnothing = 9$  mm

**Supplementary Table S2.** Implementation and performance summary comparisons of reported ‘THz Torch’ wireless links

|                               | Sep. 2011 <sup>1</sup>                   | Dec. 2011 <sup>2</sup>                   | Apr. 2013 <sup>3</sup>                   | Jun. 2014 <sup>4</sup>                   | May 2016 <sup>5</sup>                    | This Work                                 |
|-------------------------------|------------------------------------------|------------------------------------------|------------------------------------------|------------------------------------------|------------------------------------------|-------------------------------------------|
| Source Type                   | 5×Eiko-8666<br>4.7 × 3.7 mm <sup>2</sup> | 5×Eiko-8666<br>4.7 × 3.7 mm <sup>2</sup> | 5×Eiko-8666<br>4.7 × 3.7 mm <sup>2</sup> | 5×Eiko-8666<br>4.7 × 3.7 mm <sup>2</sup> | 5×Eiko-8666<br>4.7 × 3.7 mm <sup>2</sup> | INTX 17-0900<br>1.7 × 1.7 mm <sup>2</sup> |
| Emitter DC Power (mW)         | 146                                      | 4×146 = 584                              | 146                                      | 4×994 = 3,976                            | 994                                      | 898 and<br>8×898 = 7,184                  |
| Number of Channels            | 1                                        | 4                                        | 1                                        | 4                                        | 1                                        | 1 and 8                                   |
| 3 dB Bandwidth (THz)          | 25                                       | ~4×15 = 60                               | 25                                       | ~4×15 = 60                               | 25                                       | 16 and<br>~8×2.5                          |
| Modulation Mechanism          | Electronic                               | Chopper                                  | Chopper                                  | Chopper                                  | Chopper                                  | Electronic                                |
| Transmitted Data              | Clock                                    | Clock                                    | Clock                                    | Arbitrary                                | Clock                                    | Arbitrary                                 |
| Operation                     | Record and post-process                  | Record and post-process                  | Record and post-process                  | Record and post-process                  | Record and post-process                  | Fully asynchronous                        |
| Tx-Rx Lens Pair               | None                                     | None                                     | None                                     | None                                     | KBr<br>∅1.5 cm                           | ZnSe<br>∅2.5 cm                           |
| min ⇒ max Range (cm)          | 0.5 ⇒ 2.5                                | 1.0                                      | 1.0                                      | 3 ⇒ 4                                    | 12 ⇒ 15                                  | 100 ⇒ 200<br>and 50                       |
| PIR Sensor                    | Voltage mode<br>IRA-E710ST1              | Voltage mode<br>IRA-E710ST1              | Current mode<br>LME-553                  | Current mode<br>LME-553                  | Current mode<br>LME-553                  | Current mode<br>LME-335                   |
| Total NRZ Bit Rate (bps)      | 10.2 ⇒ 1                                 | 4×20.6 = 82                              | 760                                      | 4×640 = 2,560                            | 2,000                                    | 125 and<br>8×125 = 1,000                  |
| Figure of Merit<br>(cm × bps) | 5.1                                      | 82                                       | 760                                      | 10,240                                   | 30,000                                   | 25,000<br>and 50,000                      |
| Bit Error Rate (%)            | 0<br>qualitative                         | 0<br>qualitative                         | 0<br>qualitative                         | 0.11 ⇒ 15<br>quantitative                | 0.0018 ⇒ 18<br>quantitative              | see Figure<br>quantitative                |

## References

1. Lucyszyn, S., Lu, H. & Hu, F. Ultra-low cost thz short-range wireless link. In *IEEE MTT-S International Microwave Workshop Series on Millimeter Wave Integration Technologies*, 49–52 (IEEE, 2011).
2. Hu, F. & Lucyszyn, S. Ultra-low cost ubiquitous thz security systems. In *Asia-Pacific Microwave Conference 2011*, 60–62 (IEEE, 2011).
3. Hu, F. & Lucyszyn, S. Improved ‘thz torch’ technology for short-range wireless data transfer. In *2013 IEEE International Wireless Symposium*, 1–4 (IEEE, 2013).
4. Liang, X., Hu, F., Yan, Y. & Lucyszyn, S. Secure thermal infrared communications using engineered blackbody radiation. *Sci. Reports* **4**, 5245 (2014).
5. Hu, F. & Lucyszyn, S. Advances in front-end enabling technologies for thermal infrared ‘thz torch’ wireless communications. *J. Infrared, Millimeter, Terahertz Waves* **37**, 881–893 (2016).
